# Supplementary material for: Erratum to: Impaired health status and care dependency in patients with advanced COPD or chronic heart failure
Source: Springer Nature journal article supplement (doi:10.1007/s11136-012-0165-z), 2012-04-02
Supplement: MOESM1 [file 8959982]

**ONLINE SUPPLEMENT**

**Impaired health status and care dependency**

**in patients with advanced COPD or chronic heart failure**

Daisy J.A. Janssen, Frits M.E. Franssen, Emiel F.M. Wouters,

Jos M.G.A. Schols,Martijn A. Spruit

**METHODS**

***Study population***

The study population consisted of a convenience sample of outpatients with severe to very severe COPD or CHF. Chest physicians and cardiologists of one academic and six general hospitals in the south-east part of the Netherlands were asked to participate in the recruitment of patients. In total, 14 chest physicians and 30 cardiologists of one academic and five general hospitals were willing to refer patients for the study. Eligible patients were identified by the physician specialist during the outpatient consultation between January 2008 and June 2009. Patients were eligible if they had a diagnosis of severe or very severe COPD (Global initiative for chronic Obstructive Lung Disease (GOLD) stage III or IV) or severe CHF (New York Heart Association (NYHA) class III or IV). Patients who approved referral for the study were contacted by a member of the research team. Demographics were collected from a sample of eligible patients who refused participation in the study for comparison with participating patients.

**Instruments**

***Physical mobility***

Physical mobility was assessed using the timed ‘Up and Go’ (TUG) test.[1] TUG test measures in seconds the time needed to stand up from a chair, walk a distance of three meters, turn and walk back to the chair and sit down again.[1] This test was performed three times and the best score was noted. Patients were allowed to use their walking aid and/or oxygen.

***Statistics***

Categorical variables have been described as frequencies, while continuous variables have been tested for normality and are presented as mean and standard deviation (SD) or median and inter-quartile range (IQR). Categorical variables have been compared between patients with COPD and CHF using Chi square test. Continuous variables have been compared between patients with COPD and CHF using independent sample T-test or Mann-Whitney U test, as appropriate. TUG score and CDS score have been compared between COPD and CHF after adjusting for age, gender, BMI and Charlson comorbidity index score using linear regression analysis with robust standard errors. Unadjusted and adjusted p-values are reported.

Two standard multiple regression analysis models have been used to study correlates of general health status: a model with EQ-5D index score as dependent variable and a model with AQoL total score as dependent variable. The following possible variables have been tested for correlation with EQ-5D index score and/or AQoL total score: age, gender, disease, Charlson comorbidity index score, FEV1, BMI, smoking status, marital status, level of education, modified Borg scale, number of self-perceived symptoms, long-term oxygen therapy (LTOT), TUG score, HADS-A score, HADS-D score, CDS score, presence of family caregiver, need for assistance with personal care by professional caregiver and number of physician-prescribed drugs. The variables which showed bivariate correlation with EQ-5D index score and/or AQoL total score (Pearson correlation coefficient >0.30) were entered as independent variables in the standard multiple regression analysis models of EQ-5D index score and/or AQoL total score, respectively. For patients who were not able to perform TUG test because of severe impaired physical mobility, the missing value of TUG test was replaced by the highest value (65 seconds).

In addition to the standard multiple regression analysis models of EQ-5D index score and AQoL total score for COPD and CHF patients, standard multiple regression analysis for EQ-5D index score and AQoL total score have been performed for COPD or CHF, separately. These models have been used to study correlates of: EQ-5D index score in advanced COPD; EQ-5D index score in advanced CHF; AQoL total score in advanced COPD; and AQoL total score in advanced CHF. The following possible variables have been tested for correlation with EQ-5D index score and/or AQoL total score: age, gender, Charlson comorbidity index score, FEV1, BMI, smoking status, marital status, level of education, modified Borg scale, number of symptoms, LTOT, TUG score, HADS-A score, HADS-D score, CDS score, presence of family caregiver, need for assistance with personal care by professional caregiver and number of physician-prescribed drugs. The variables which showed bivariate correlation with EQ-5D index score and/or AQoL total score (Pearson correlation coefficient >0.30) were entered as independent variables in the standard multiple regression analysis models of EQ-5D index score and/or AQoL total score, respectively.

Furthermore, two standard multiple regression analysis models have been used to study correlates of disease-specific health status: a model with SGRQ total score as dependent variable for COPD patients and a model with MLHFQ total score as dependent variable for CHF patients. Age, gender, Charlson comorbidity index score, FEV1, BMI, smoking status, marital status, level of education, modified Borg scale, number of symptoms, LTOT, TUG score, HADS-A score, HADS-D score, CDS score, presence of family caregiver, need for assistance with personal care by professional caregiver and number of physician-prescribed drugs were tested for bivariate correlation with SGRQ total score and/or MLHFQ total score. Variables which showed bivariate correlation with SGRQ total score and/or MLHFQ total score (Pearson correlation coefficient >0.30) were entered as independent variables in the standard multiple regression models of SGRQ total score or MLHFQ total score, respectively.

Statistics were done using SPSS 17.0. STATA 11.1 has been used for linear regression with robust standard errors. A priori, a two-sided level of significance has been set at p≤ 0.05.[2]

**RESULTS**

***Physical mobility***

Seven COPD patients (6.7%) and seven CHF patients (8.8%) were not able to perform the TUG test because of severe impairment in physical mobility (p>0.05). CHF patients needed more time to perform TUG test than COPD patients (median (IQR): 15 (11-19) seconds vs. 10 (8-12) seconds, respectively, p<0.05). Linear regression analysis confirmed these findings (p=0.005, adjusted for age, gender, BMI and Charlson comorbidity index score). The linear regression model also showed a statistically significant association between age and TUG test (adjusted p<0.0005) and BMI and TUG test (adjusted p=0.014). Older patients and patients with a higher BMI needed more time to perform TUG test.

***Correlates of EQ-5D index score and/or AQoL total score in patients with advanced COPD***

Some differences were present in the standard multiple regression analysis models of EQ-5D index score and AQoL total score for COPD patients alone, compared to the models for COPD and CHF patients. The standard multiple regression models explained 58.7% and 66.6% of the variance of EQ-5D index score and AQoL total score, respectively. Correlation of TUG test and CDS score with EQ-5D index score did not reach the level of statistical significance for COPD patients alone. Furthermore, Borg scale contributed statistically significant to the standard multiple regression model of AQoL total score in COPD patients, while number of drugs did not contribute statistically significant (table 1).

***Correlates of EQ-5D index score and/or AQoL total score in patients with advanced CHF***

Some differences were present in the standard multiple regression analysis models of EQ-5D index score and AQoL total score for CHF patients alone, compared to the model for COPD and CHF patients. The standard multiple regression models explained 67.6% and 66.6% of the variance of EQ-5D index score and AQoL total score, respectively. BMI was correlated with EQ-5D index score in CHF patients. Higher BMI was associated with more impairment in general health status as assessed with EQ-5D index score. Furthermore, HADS-A and number of physician-prescribed drugs did not show correlation with EQ-5D index score in CHF alone. For AQoL total score, HADS-D did not contribute statistically significant to the model (table 2)*.*

**ReferenceS**

1. Podsiadlo, D. and S. Richardson, The timed "Up & Go": a test of basic functional mobility for frail elderly persons*.* *J Am Geriatr Soc*. 1991;39(2):142-8.

2. Altman, D.G., S.M. Gore, M.J. Gardner, and S.J. Pocock, Statistical guidelines for contributors to medical journals*.* *Br Med J (Clin Res Ed)*. 1983;286(6376):1489-93.

***Table 1. Correlates of general health status in COPD: results of standard multiple regression models***

| **Model** | **Correlates** | **Standardized Beta** | **p-value** |
| --- | --- | --- | --- |
| **EQ-5D index score** | **Number of symptoms** | **-0.206** | **0.015** |
| (R2=0.587, p<0.0005) | TUG test | -0.125 | 0.134 |
|  | **HADS-A** | **-0.210** | **0.021** |
|  | HADS-D | -0.124 | 0.171 |
|  | Borg scale | -0.041 | 0.580 |
|  | CDS | 0.172 | 0.072 |
|  | **Need professional caregiver** | **-0.187** | **0.014** |
|  | **Number of drugs** | **-0.148** | **0.037** |
| **AQol total score** | Number of symptoms | -0.144 | 0.058 |
| (R2=0.666, p<0.0005) | TUG test | -0.019 | 0.800 |
|  | HADS-A | -0.056 | 0.485 |
|  | **HADS-D** | **-0.239** | **0.004** |
|  | **Borg scale** | **-0.178** | **0.009** |
|  | **CDS** | **0.307** | **0.001** |
|  | **Need professional caregiver** | **-0.184** | **0.007** |
|  | Number of drugs | -0.121 | 0.058 |

*Abbreviations: Assessment of Quality of Life instrument (AQoL); Care Dependency Scale (CDS); EuroQol-5 Dimensions (EQ-5D); Hospital Anxiety and Depression Scale, Anxiety subscale (HADS-A); Hospital Anxiety and Depression Scale, Depression subscale (HADS-D); Timed ‘Up and Go’ test (TUG test).*

*n=105*

***Table 2. Correlates of general health status in CHF: results of standard multiple regression models***

| **Model** | **Correlates** | **Standardized Beta** | **p-value** |
| --- | --- | --- | --- |
| 1. **EQ-5D index score** | **BMI** | **-0.182** | **0.022** |
| (R2=0.676, p<0.0005) | Gender | -0.058 | 0.481 |
|  | Marital status | 0.093 | 0.296 |
|  | **Number of symptoms** | **-0.066** | **0.500** |
|  | **TUG test** | **-0.323** | **0.000** |
|  | HADS-A | -0.110 | 0.268 |
|  | HADS-D | 0.002 | 0.983 |
|  | Borg scale | -0.018 | 0.827 |
|  | **CDS** | **0.422** | **0.000** |
|  | **Need professional caregiver** | -0.074 | 0.386 |
| **AQol total score** | **Number of symptoms** | **-0.260** | **0.006** |
| (R2=0.666, p<0.0005) | HADS-A | -0.082 | 0.389 |
|  | HADS-D | -0.067 | 0.496 |
|  | Borg scale | -0.008 | 0.922 |
|  | **CDS** | **0.383** | **0.000** |
|  | **Need professional caregiver** | **-0.287** | **0.000** |
|  | **Number of drugs** | **-0.155** | **0.041** |

*Abbreviations: Assessment of Quality of Life instrument (AQoL); Body Mass Index (BMI); Care Dependency Scale (CDS); EuroQol-5 Dimensions (EQ-5D); Hospital Anxiety and Depression Scale, Anxiety subscale (HADS-A); Hospital Anxiety and Depression Scale, Depression subscale (HADS-D); Timed ‘Up and Go’ test (TUG test).*

*n=80*
